# Supplementary material for: First Detection and Genetic Characterization of Equus Caballus Papillomavirus 1, 2 and 7 in China
Source: Research Square preprint supplement (doi:10.21203/rs.3.rs-243215/v1), 2021-02-26
Supplement: Supplementary file 1 [file de7f816d9d17931e13a6f828.docx]

**First detection and genetic characterization of Equus caballus papillomavirus 1, 2 and 7 in China**

Panpan Tong, Xiaozhen Song, Meiling Ren, Erken Jia, Lei Zhang, Nuerlan Palidan, Ruli Duan, Chenyang Jia, Ling Kuang, Jinquan Wang, Jinxin Xie

**Table S2** Primer sequences used for amplification of the EcPV-1, 2 and 7 complete sequences

| Primer | Sequence (5'-3') | Product size (bp) |
| --- | --- | --- |
| EcPV-1 F1 | ATGGCGCGGCCGCGACCTAT | 1525 |
| EcPV-1 R1525 | CAATACATAGCCGCCGCCACACTG |
| EcPV-1 F1204 | CATTTGGCGTGCCTTATGGGGAGCT | 1511 |
| EcPV-1 R2714 | TAGGAGGAGCCCTGCAGACTCAAC |
| EcPV-1 F2407 | TTATGGAGAGCATTAGACCTCAGCG | 1593 |
| EcPV-1 R3999 | CCCACAGGTGTATACCCGAACCG |
| EcPV-1 F3637 | CGAGGTGTCACGGCTACCTCCTTTA | 1406  581  1187  1151 |
| EcPV-1 R5042  EcPV-1 F4886  EcPV-1 R5466  EcPV-1 F5330  EcPV-1 R6516  EcPV-1 F6463  EcPV-1 R7613 | GTCATATACACTGCAGGTTCAATGC  AGCTACTCGATGAGGAGGTGATAG  CAAAAACATTGCTATCAGGAAGAGC  CCACCCATTCTACGAGATAAC  CACCTCCTCAGGTGGATTAGGCG  GTTCGGTCTTGGAGGACACCTAC  TTGTGGTGCTGTGGCGCCGCTGGCT |
| EcPV-2 F81 | GCAGACTGGGTCTTTGTGAGTCAG |  |
| EcPV-2 R723 | GCTGGTCTTCCTCGTCTTCTGTGTC | 642 |
| EcPV-2 F701 | CACAGAAGACGAGGAAGACCAGC |  |
| EcPV-2 R1603 | CGAACAGAATACGCAAGCACCAC | 902 |
| EcPV-2 F1581 | GTGGTGCTTGCGTATTCTGTTCG |  |
| EcPV-2 R2776 | GGTTCTCCATCGTCTCCCTCGTC | 1195 |
| EcPV-2 F2754 | GACGAGGGAGACGATGGAGAACC |  |
| EcPV-2 R3325 | CGACCCAGTGTCCTCCAGTTCC | 571 |
| EcPV-2 F3310 | GGAGGACACTGGGTCGTGAAGG |  |
| EcPV-2 R4487 | CCACCGTCTCCACTCCTACACC | 1177 |
| EcPV-2 F4467 | GTGTAGGAGTGGAGACGGTGGG |  |
| EcPV-2 R5507 | CACGGATGTCCACCATAGCCAC | 1040 |
| EcPV-2 F5339 | GACCTGGCGAGTATTGGTAGTGTTG |  |
| EcPV-2 R6431 | CTCCCGCCTAGCATAGAAGAACATG | 1092 |
| EcPV-2 F6305 | GTACCTCTGCGAGAACAAGTCAGAC |  |
| EcPV-2 R7431 | GGCAGAAAGTCAACTGGAGATTAGC | 1126 |
| EcPV-2 F7357 | GACTTCCTGCCATGAACACCTAATC |  |
| EcPV-2 R162 | GATTGTGGTCCACAACAATCTTCTC | 607 |
| EcPV-7 F126 | CGTGGATTTGGTGGCATTTAG |  |
| EcPV-7 R615 | GGCAGTAGTAGCAATAGGTCAGC | 489 |
| EcPV-7 F599 | CTATTGCTACTACTGCCAACAAGGTG |  |
| EcPV-7 R1443 | GGTGGTTGGACGCAAGGTTAG | 844 |
| EcPV-7 F1422 | CCTAACCTTGCGTCCAACCAC |  |
| EcPV-7 R2145 | GGCATTAGCATAGGACAGCAC | 723 |
| EcPV-7 F2077 | GGGAAATCCTTGTTCTGTATGAGC |  |
| EcPV-7 R3257 | CCTTTGATAGAGGTCCGAAACGAG | 1180 |
| EcPV-7 F3233 | GCTCGTTTCGGACCTCTATC |  |
| EcPV-7 R4297 | CGAGCCACTGACCACAGAAGG | 1064 |
| EcPV-7 F4256 | CAGCCTTTAGAGCCTGGTGG |  |
| EcPV-7 R5487 | CCACAGTCAACAGTCGTTCGCTAC | 1231 |
| EcPV-7 F5285 | CTATCTGCTTTGACCTTCGTCTTAC |  |
| EcPV-7 R6912 | CCGTGCTAACCAAAGACCC | 1627 |
| EcPV-7 F6805 | GTAGAAGCACTAAGCAGACCACC |  |
| EcPV-7 R7569 | CATAGTGAACAACAACAATCGTCC | 764 |
| EcPV-7 F7487 | CTGTTTCTGCCCGCTTCCACC |  |
| EcPV-7 R233 | CTCTCAATAAACAGCAGTGCTTTC | 365 |
